# Supplementary material for: Countercurrent heat exchange and thermoregulation during blood-feeding in kissing bugs
Source: eLife. 2017 Nov 21;6:e26107. doi: 10.7554/eLife.26107 (PMC5697934; doi:10.7554/eLife.26107)
Supplement: Figure 2—source data 1. — Sheet 1 (T°C): raw data; sheet 2 (∆T°C) temperature difference between blood and the different parts of the insect body. [file elife-26107-fig2-data1.xlsx]

## Sheet: T°C
P16-32	T16-32	Th16-32	A16-32	P16-37	T16-37	Th16-37	A16-37	P21-32	T21-32	Th21-32	A21-32	P21-37	T21-37	Th21-37	A21-37	P21-42	T21-42	Th21-42	A21-42	P26-37	T26-37	Th26-37	A26-37	P26-42	T26-42	Th26-42	A26-42	P31-37	T31-37	Th31-37	A31-37	P31-42	T31-42	Th31-42	A31-42
28.4	24.5	20.5	19.1	31.9	25.8	24	20.2	30.6	28.2	27.5	25.1	33.4	30.1	28.9	26.4	39	36	34.5	29.8	36.1	32.3	31.3	28.9	40.5	37.1	35.2	30.2	36.8	34.5	33.3	32.2	40.6	38.8	37.9	35.9
28.3	24.3	20.6	19.3	32.7	26	24	20.3	30.1	28.4	27.3	25.1	32.7	28.7	28.1	25.9	39.2	36	34.3	29.9	36.5	32.7	31.9	29.1	39.9	37.2	35.4	30.9	36.9	34.6	33.4	32.4	40	38.1	37.2	35.2
28.5	24.6	20.7	19.3	35.9	29.1	25	21.5	30	28.5	27.5	25.1	32.4	29.8	28.3	25.9	38.6	33.8	32	29.6	36	33.1	31.4	29	39.9	37.3	35.4	30.8	36.9	33.9	32.9	32.5	40.3	38.7	37.5	35.5
28.3	24.3	20.6	19.4	35.5	28.9	25.9	21.5	29.8	27.9	27.4	25.4	33.7	29.9	28.5	26.1	38.7	34.8	31.8	27.1	36.2	32.7	31.3	29.1	41	37.4	35.5	30.9	36.7	34.1	33	32.2	40.2	38.8	37.8	35.7
28.3	24.3	20.7	19.3	35.7	29.2	25.4	21.5	30.3	27.9	27.2	25.3	33.5	29.9	28.6	26.1	39.2	35	33.2	29.2	36.2	33	31.3	28.9	40.6	36.9	34.8	30.6	36.9	34.5	33.5	32.5	40	38.8	37.8	35.9
28	24.3	20.5	19.2	35.6	29.3	26.5	21.5	30.2	28.2	27.5	25.2	33.2	30.3	28.5	26.2	39.4	35.2	33.4	29.3	36.3	32.7	31.6	29.2	40.7	36.9	35.2	30.5	36.7	34.2	33.4	32.7	40	38.5	37.4	35.5
28.1	24.2	20.8	19.3	35	27.8	25.7	22.1	30.4	28.3	27.5	25.3	33.4	29.6	28.1	26	39.1	35.1	33.3	29.4	36.4	32.8	31.5	29	40.8	37	35.4	30.8	36.9	34.5	33.3	32.7	40.1	38.6	37.6	35.7
28.3	24.2	20.9	19.4	34.7	27.9	25.3	22.2	30.2	28	27.6	25.3	33.2	29.6	27.9	25.7	39	35.4	33.4	29.5	35.9	31.7	30.5	28.8	40.9	37	35.4	31	36.6	34.4	33.3	32.2	40.4	38.6	37.3	35.9
28.2	24.1	20.8	19.3	36.1	29.3	25.4	22.1	30.1	27.9	27.3	25.4	33.2	29.8	28.1	25.6	39	35.7	33.5	29.5	36.1	32.4	31.4	28.6	40.7	37.1	35.1	30.6	36.8	34.5	33.4	32.3	40.6	38.9	37.5	35.4
28.4	24.2	21	19.5	35.7	28.9	25.3	21.9	30.3	28.1	27.3	25.3	33.2	29.8	28.5	25.6	39	35.7	33.4	29.6	36.6	32.7	31.3	29.2	40	37	35	31	36.5	34.4	33.1	32.2	40.3	38.6	37.4	35.4
28.4	23.8	21.5	20.5	35.9	28.9	25.7	21.5	30.6	28.1	27.6	25.3	33.5	29.9	28.4	26	39	35.7	34.1	28.6	36.2	32.5	31.4	28.9	41	36.4	34.7	31.2	36.7	34.4	32.9	32	40.3	38.8	37.8	35.8
29.1	24	21.8	20.7	35.5	28.7	25.4	21.5	30.5	28.2	27.4	25.3	33.4	30.1	28.5	25.8	38.5	36.1	34.3	29.6	36.1	33.1	31.5	28.9	40	36.3	34.6	30.6	36.7	34.2	33.6	32.1	40.7	38.9	37.9	35.1
28.8	23.6	21.9	20.9	35.4	29	25.8	21.7	30.4	28.3	27.5	25.3	33.6	30.1	28.5	25.7	38.7	34.1	32.3	29.2	36.2	32.4	31.3	28.9	40	36.2	34.4	30.4	36.7	34.1	33.1	32.3	41.1	39	38.1	35.6
29	23.8	21.8	21	36	29.1	25.4	21.6	30.3	28.4	27.5	25.3	33.5	30.2	28.5	25.9	38.3	34.3	32.6	29.5	36.1	32.5	31.2	28.8	40.3	36.3	34.7	30.7	36.8	34.5	33.2	32.7	41.1	39.3	38.5	35.7
28.5	24	22	21	35.4	28.3	25.3	21.4	30	27.8	27.3	25.2	33.7	30.3	28.8	25.9	39.3	35.6	33.4	29.5	36.4	32.3	31.4	28.9	40.1	36.5	34.8	30.8	36.6	34.4	33.1	32.6	40.5	39.2	38.4	35.7
29.2	23.9	22.1	21.2	35.5	27.6	25	21.5	30.5	28.1	27.2	25.2	33	30.5	28.5	26.1	39.1	35.3	33.3	29.9	36.5	32.7	31.5	29.3	39.9	36.6	34.9	30.9	36.9	34.6	33.4	32.5	41.1	39.1	38.3	35.9
29.2	24.1	22.3	21.2	35.3	27.8	24.6	21.5	30.2	28.2	27.1	25.2	33.6	30.1	28.5	26	39.6	35.2	33	29.7	36.8	33.3	31.9	29.2	40	36.8	35.1	31	36.7	34.4	33.1	32.6	41.4	39.2	38.3	36
29.3	24.5	22.5	21.2	35	28	25.1	21.5	30.2	28.4	27.3	25.2	33.6	30.1	28.5	26.1	39.2	35.1	33.1	29.6	36.5	32.9	31.8	29.1	40.4	36.7	35	30.9	36.8	34.6	33	32.5	41.3	39.5	38.4	35.9
29.3	23.8	21.9	21	34.9	27.4	24.3	21.5	30.3	28.3	27	25.1	33	29.1	27	25.2	39.3	35.5	33.3	29.6	36.5	32.7	31.7	29.1	40.3	36.9	34.8	31.1	36.5	34.1	33.1	32.2	40.9	39	37.8	35.7
29.3	23.9	22.2	21.1	35	27.7	24.3	21.4	30.2	28.2	27.2	25.3	32.9	29.5	27.9	25.5	39.6	35.7	33.5	29.7	36.6	33.1	31.5	29.2	40.7	36.7	34.9	31	36.5	34.1	33.4	32.2	41.7	39.3	38.2	35.4
29.3	25.6	22.9	20.2	35.1	27.3	24.3	21.5	30.1	28.3	27.4	25.4	33	29.5	28.2	25.2	39	35.2	33.8	29.3	36.3	32.4	31.3	28.9	39.5	36	34.2	30.3	36.9	34.5	33.5	32.5	40.7	39.2	38.3	35.7
29.2	25.3	23.3	20.4	35.8	29	25.3	21.5	30.3	28.1	27.2	25.5	33.2	29.8	28.2	25.4	38.9	33.9	32	29.1	36.4	32.6	31.4	28.9	39.4	35.4	33.6	30.2	36.7	34.2	33.2	32.3	41.2	39.1	38.3	35.9
29.4	25.6	23.6	20.6	35.7	29.3	25.3	21.2	30.3	28.1	27.3	25.4	33.3	29.6	28.2	25.6	39	35.8	34.1	29.2	36.7	32.7	31.3	29.2	39.9	35.4	33.3	30.1	36.7	34.4	32.8	32.5	41.5	39.2	38.3	35.9
28.7	25.9	23.7	20.5	35.6	28.9	26.1	21.6	30.1	28.3	27.4	25.4	33.2	29.7	28.1	25.6	38.9	35.7	34.2	29.4	36.8	33.1	31.4	29.3	39.5	34.6	32.9	29.2	36.9	34.6	33.4	32.3	41.5	39.3	38.5	36
29.2	25.7	24.1	20.9	35.4	28.9	25.5	21.8	30	28.3	27.4	25.6	33.3	29.9	28.1	25.7	39	35.4	33.8	29.7	36.1	32.5	31.3	29	40.8	34.4	32.5	30.8	36.6	33.9	33.1	32.3	41.5	38.9	38.1	36
29.3	24.7	23.1	21	35.6	29.3	25.4	21.3	29.9	27.9	26.9	25.2	33.2	30	28	25.6	39.1	35.8	34	29.4	36.1	32.5	31.4	29	40.3	36.9	33.4	30.4	36.9	34.2	33.4	32.5	41.2	38.9	38.2	35.7
29.2	24.9	23	21.1	35.6	29.2	24.4	21.7	29.6	27.9	27.2	25.2	33.1	29.7	28.2	25.7	39.3	36	33.8	29.8	36.4	32.7	31.7	29	39.8	36.1	32.9	30.4	36.6	33.9	33.6	32.5	40.1	38.5	37.9	35.2
29.3	25.3	23.7	21.1	35.7	28.9	25.3	21.3	29.5	27.9	27.1	25.1	33.2	29.7	28	25.8	39.1	35.8	33.9	29.8	35.9	31.8	30.4	28.7	39.4	35.8	33.7	30.1	36.8	34.6	33.4	32.2	40.5	38.4	37.8	35.4
28.3	25.4	22.9	21.2	35.3	28.7	25.6	21.4	29.5	27.7	26.9	25.2	33.1	29.8	28.1	25.6	39.1	35.6	33.9	29.9	36.4	32.3	31.4	28.9	39.4	35.7	33.3	29.8	36.8	34.5	33.4	32.5	40.6	38.6	37.9	35.4
28.2	25.1	23.4	21.1	35.4	28.8	25.4	21.5	29.6	27.8	26.9	25.3	33.5	29.8	28.3	25.9	39	35.2	33.7	29.7	36.3	32.2	31.3	29	39.6	35.8	33.4	29.8	36.7	34.1	33	32.2	40.8	38.9	38.3	35.3
28.28	24.3	20.71	19.31	34.88	28.22	25.25	21.48	30.2	28.14	27.41	25.25	33.19	29.75	28.35	25.95	39.02	35.27	33.28	29.29	36.23	32.61	31.35	28.98	40.5	37.09	35.24	30.73	36.77	34.36	33.26	32.39	40.25	38.64	37.54	35.61
29.01	23.94	22	20.98	35.39	28.25	25.09	21.51	30.32	28.2	27.31	25.24	33.38	29.99	28.31	25.82	39.06	35.26	33.29	29.49	36.39	32.75	31.52	29.03	40.27	36.54	34.79	30.86	36.69	34.34	33.19	32.37	41.01	39.13	38.17	35.68
29.01	25.35	23.37	20.81	35.52	28.83	25.26	21.48	29.89	28.03	27.17	25.33	33.21	29.75	28.14	25.61	39.04	35.44	33.72	29.53	36.34	32.48	31.29	28.99	39.76	35.61	33.32	30.11	36.76	34.29	33.28	32.38	40.96	38.9	38.16	35.65
28.7667	24.53	22.0267	20.3667	35.2633	28.4333	25.2	21.49	30.1367	28.1233	27.2967	25.2733	33.26	29.83	28.2667	25.7933	39.04	35.3233	33.43	29.4367	36.32	32.6133	31.3867	29	40.1767	36.4133	34.45	30.5667	36.74	34.33	33.2433	32.38	40.74	38.89	37.9567	35.6467
0.324444	0.546667	0.895556	0.704444	0.255556	0.264444	0.0733333	0.0133333	0.164444	0.0622222	0.0844444	0.0377778	0.08	0.106667	0.0844444	0.122222	0.0133333	0.0777778	0.193333	0.0977778	0.06	0.0911111	0.0888889	0.02	0.277778	0.535556	0.753333	0.304444	0.0333333	0.0266667	0.0355556	0.00666667	0.326667	0.166667	0.277778	0.0244444
D16	D16	D16	D16		D11	D11	D11	D11		D21	D21	D21	D21		D6	D6	D6	D6
12.28	8.3	4.71	3.31		9.2	7.14	6.41	4.25		18.88	12.22	9.25	5.48		5.77	3.36	2.26	1.39
13.01	7.94	6	4.98		9.32	7.2	6.31	4.24		19.39	12.25	9.09	5.51		5.69	3.34	2.19	1.37
13.01	9.35	7.37	4.81		8.89	7.03	6.17	4.33		19.52	12.83	9.26	5.48		5.76	3.29	2.28	1.38
12.19	8.75	7.35	4.95		10.23	6.61	5.35	2.98		18.02	14.27	12.28	8.29
12.38	8.99	7.31	4.82		10.39	6.75	5.52	3.03		18.06	14.26	12.29	8.49
12.21	8.75	7.14	4.61		10.34	6.48	5.29	2.99		18.04	14.44	12.72	8.53
14.5	11.09	9.24	4.73		9.25	7.64	6.54	4.61
14.27	10.54	8.79	4.86		10.01	8.13	7.17	4.68
13.76	9.61	7.32	4.11		9.96	7.9	7.16	4.65
13.0678	9.25778	7.24778	4.57556		9.73222	7.20889	6.21333	3.97333		18.6517	13.3783	10.815	6.96333		5.74	3.33	2.24333	1.38
0.739259	0.790864	0.865185	0.384691		0.504198	0.454074	0.560741	0.648889		0.611667	0.945	1.615	1.47333		0.0333333	0.0266667	0.0355556	0.00666667

## Sheet: ∆T°C
D6	5.77	P
D6	5.69	P
D6	5.76	P
D6	3.36	Te
D6	3.34	Te
D6	3.29	Te
D6	2.26	Th
D6	2.19	Th
D6	2.28	Th
D6	1.39	Ab
D6	1.37	Ab
D6	1.38	Ab
D11	9.2	P
D11	9.32	P
D11	8.89	P
D11	10.23	P
D11	10.39	P
D11	10.34	P
D11	9.25	P
D11	10.01	P
D11	9.96	P
D11	7.14	Te
D11	7.2	Te
D11	7.03	Te
D11	6.61	Te
D11	6.75	Te
D11	6.48	Te
D11	7.64	Te
D11	8.13	Te
D11	7.9	Te
D11	6.41	Th
D11	6.31	Th
D11	6.17	Th
D11	5.35	Th
D11	5.52	Th
D11	5.29	Th
D11	6.54	Th
D11	7.17	Th
D11	7.16	Th
D11	4.25	Ab
D11	4.24	Ab
D11	4.33	Ab
D11	2.98	Ab
D11	3.03	Ab
D11	2.99	Ab
D11	4.61	Ab
D11	4.68	Ab
D11	4.65	Ab
D16	12.28	P
D16	13.01	P
D16	13.01	P
D16	12.19	P
D16	12.38	P
D16	12.21	P
D16	14.5	P
D16	14.27	P
D16	13.76	P
D16	8.3	Te
D16	7.94	Te
D16	9.35	Te
D16	8.75	Te
D16	8.99	Te
D16	8.75	Te
D16	11.09	Te
D16	10.54	Te
D16	9.61	Te
D16	4.71	Th
D16	6	Th
D16	7.37	Th
D16	7.35	Th
D16	7.31	Th
D16	7.14	Th
D16	9.24	Th
D16	8.79	Th
D16	7.32	Th
D16	3.31	Ab
D16	4.98	Ab
D16	4.81	Ab
D16	4.95	Ab
D16	4.82	Ab
D16	4.61	Ab
D16	4.73	Ab
D16	4.86	Ab
D16	4.11	Ab
D21	18.88	P
D21	19.39	P
D21	19.52	P
D21	18.02	P
D21	18.06	P
D21	18.04	P
D21	12.22	Te
D21	12.25	Te
D21	12.83	Te
D21	14.27	Te
D21	14.26	Te
D21	14.44	Te
D21	9.25	Th
D21	9.09	Th
D21	9.26	Th
D21	12.28	Th
D21	12.29	Th
D21	12.72	Th
D21	5.48	Ab
D21	5.51	Ab
D21	5.48	Ab
D21	8.29	Ab
D21	8.49	Ab
D21	8.53	Ab
