# Supplementary material for: Countercurrent heat exchange and thermoregulation during blood-feeding in kissing bugs
Source: eLife. 2017 Nov 21;6:e26107. doi: 10.7554/eLife.26107 (PMC5697934; doi:10.7554/eLife.26107)
Supplement: Figure 2—source data 2. — Sheet 1 (Data and t-test): raw data and statistical analysis; sheet 2 (Summary): summary of results and graph. [file elife-26107-fig2-data2.xlsx]

## Sheet: Data and t-test
	29-07-17 Análise qPCR- Expressão HSP70 após remoção de parte do vaso dorsal
		Controle (cortado, mas com vaso dorsal íntegro)						Teste (vaso dorsal rompido)
	Insetos:	C1	C2	C3	C4	C5		T1	T2	T3	T4	T5
	Tub (média Ct)	16.02	15.61	14.96	15.6	15.9		14.27	13.94	15.05	16.11	15.34
Primer 1	HSP70 rt3 (média Ct)	17.97	18.22	17.2	17.92	18.14		16.02	15.21	16.31	17.08	17.07
	dct	1.95	2.61	2.24	2.32	2.24		1.75	1.27	1.26	0.97	1.73
	2e-dct	0.258816	0.163799	0.211686	0.200267	0.211686		0.297302	0.41466	0.417544	0.510506	0.301452
	média	0.209251
	Calibrador: Controle=1	1.23246	0.779996	1.00803	0.953655	1.00803		1.41572	1.97457	1.9883	2.43098	1.43549
	media final	0.996434						1.84901
	teste t	0.00313504
Primer 2	HSP70 T7 (média Ct)	19.63	19.78	18.47	19.17	19.5		16.95	16.65	17.45	18.29	18.83
	dct	3.61	4.17	3.51	3.57	3.6		2.68	2.71	2.4	2.18	3.49
	2e-dct	0.0818996	0.0555527	0.0877778	0.0842021	0.0824692		0.156041	0.15283	0.189465	0.220676	0.0890031
	média	0.0783803
	Calibrador: C=1	1.02374	0.694408	1.09722	1.05253	1.03087		1.95052	1.91038	2.36831	2.75845	1.11254
	media final	0.979754						2.02004
	teste t	0.0063623
	HSP90 rt	20.96	21.23	20.35	20.83	20.87		20.01	21.09	20.69	21.17	22.19
	dct	4.94	5.62	5.39	5.23	4.97		5.74	7.15	5.64	5.06	6.85
	2e-dct	0.0325771	0.0203335	0.0238478	0.0266448	0.0319066		0.0187106	0.00704102	0.0200535	0.029977	0.00866851
	média	0.027062
	Calibrador: C=1	1.20242	0.750506	0.88022	0.983458	1.17767		0.690607	0.259883	0.740174	1.10645	0.319954
	media final	0.998854						0.623413
	teste t

## Sheet: Summary
	Resultado final- utilizando o Primer 1 (rt3) - HSP70
	Obs: as reaçãoes de qPCR são mais eficientes com este par de primers						Expressão HSP90
	Amostras	Control	Test (severed dorsal vessel)				Control		Test
	1	1.23246	1.41572				1.20242		0.690607
	2	0.779996	1.97457				0.750506		0.259883
	3	1.00803	1.9883				0.88022		0.740174
	4	0.953655	2.43098				0.983458		1.10645
	5	1.00803	1.43549				1.17767		0.319954
	Média	0.996434	1.84901				0.998854		0.623413
	desvio	0.16175	0.42796
	teste t	0.00313504					0.0664493
	Gráfico e análise estatística - Prism
